# Supplementary material for: Simultaneous enhancement in the power factor and thermoelectric performance of copper sulfide by In2S3 doping
Source: Royal Society of Chemistry journal article supplement (doi:10.1039/c6ta03780a), 2016-01-01
Supplement: c6ta03780a1.pdf [file c6ta03780a1.pdf]

## Simultaneous enhancement in power factor and thermoelectric performance of copper sulfide by $\text{In}_2\text{S}_3$ doping

www.rsc.org/

Qing-Long Meng,<sup>a,†</sup> Shuang Kong,<sup>a,b,†</sup> Zhiwei Huang,<sup>a,b</sup> Yuanhu Zhu,<sup>a</sup> Heng-Chang Liu,<sup>a,c</sup> Xiaowei Lu,<sup>a,b</sup> Peng Jiang<sup>a,\*</sup> and Xinhe Bao<sup>a</sup>

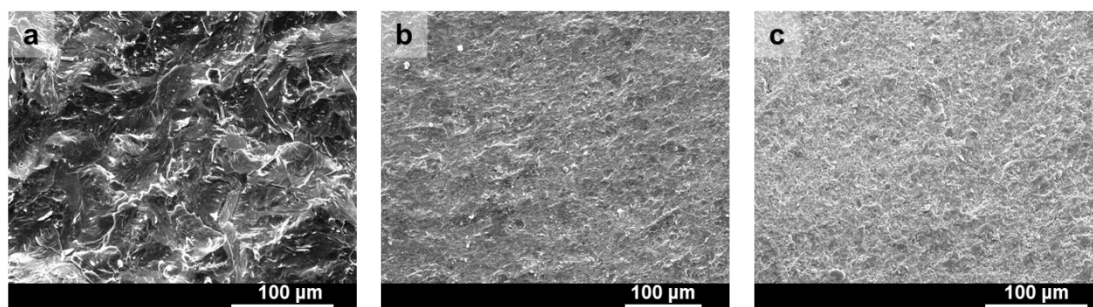

**Supplementary Figure S1.** SEM images of  $\text{Cu}_2\text{S}-x\%\text{In}_2\text{S}_3$  ( $x=1, 5$  and  $10$ ). **a.**  $\text{Cu}_2\text{S}-1\%\text{In}_2\text{S}_3$ . **b.**  $\text{Cu}_2\text{S}-5\%\text{In}_2\text{S}_3$ . **c.**  $\text{Cu}_2\text{S}-10\%\text{In}_2\text{S}_3$ .

<sup>a</sup> State Key Laboratory of Catalysis, Dalian Institute of Chemical Physics, Chinese Academy of Sciences, Dalian 116023, China. \*Email: pengjiang@dicp.ac.cn  
xhbao@dicp.ac.cn

<sup>b</sup> University of Chinese Academy of Sciences, Beijing 100039, China

<sup>c</sup> School of Physical Science and Technology, ShanghaiTech University, Shanghai 200031, China.

<sup>†</sup> These authors contribute equally.

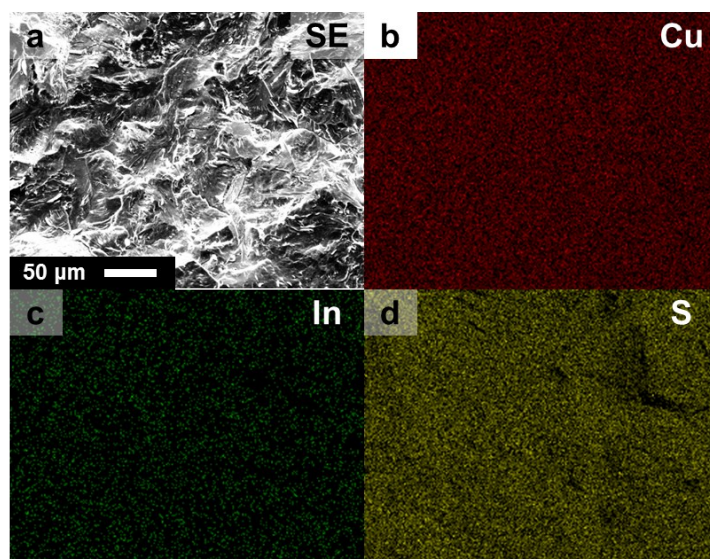

**Supplementary Figure S2.** EDX elemental maps of  $\text{Cu}_2\text{S}-1\%\text{In}_2\text{S}_3$ . **a.** SE. **b.** Cu. **c.** In. **d.** S.

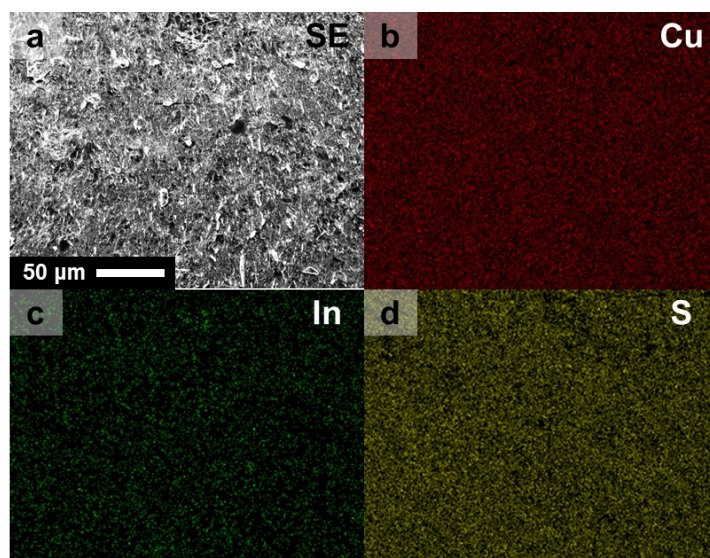

**Supplementary Figure S3.** EDX elemental maps of  $\text{Cu}_2\text{S}-2\%\text{In}_2\text{S}_3$ . **a.** SE. **b.** Cu. **c.** In. **d.** S.

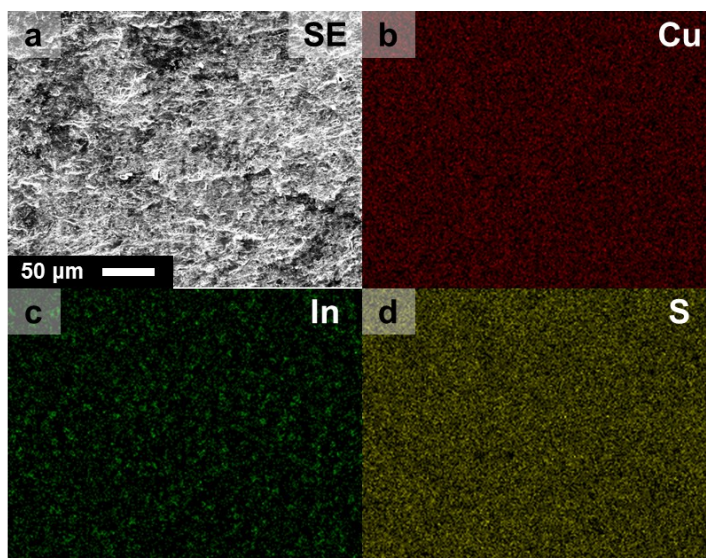

**Supplementary Figure S4.** EDX elemental maps of  $\text{Cu}_2\text{S}-5\%\text{In}_2\text{S}_3$ . **a.** SE. **b.** Cu. **c.** In. **d.** S.

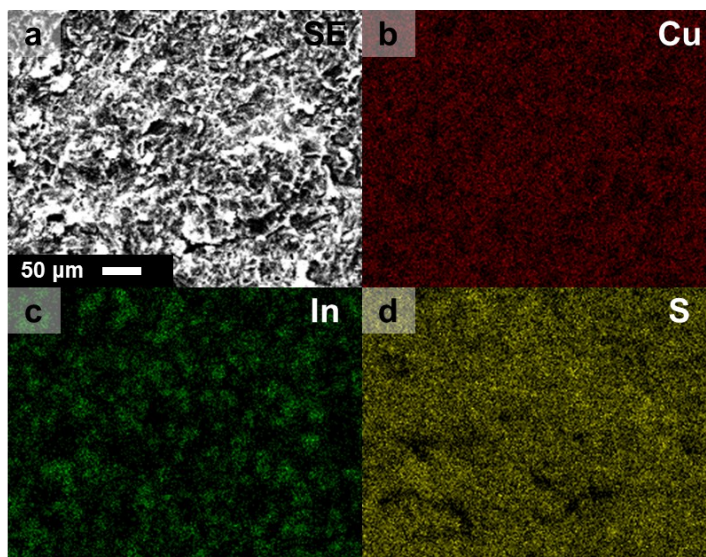

**Supplementary Figure S5.** EDX elemental maps of  $\text{Cu}_2\text{S}-10\%\text{In}_2\text{S}_3$ . **a.** SE. **b.** Cu. **c.** In. **d.** S.



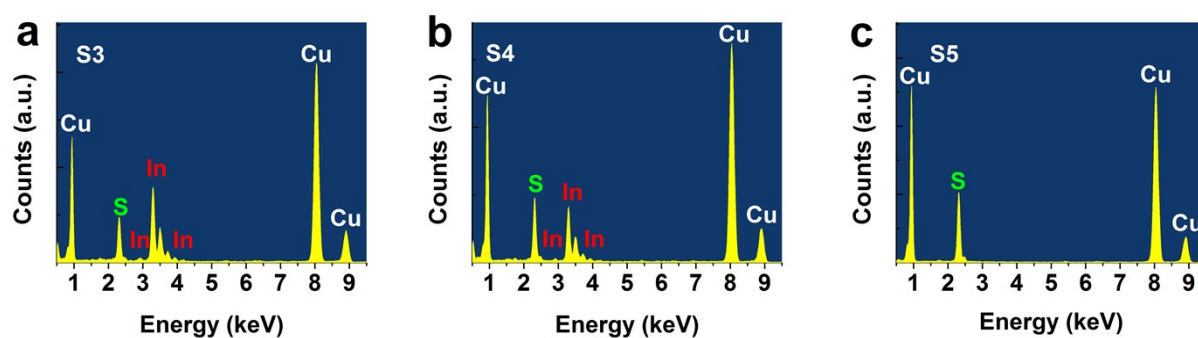

**Supplementary Figure S6.** EDX spectra of  $\text{Cu}_2\text{S}-2\%\text{In}_2\text{S}_3$  for different spots. **a.** Spot3 (S3). **b.** Spot4 (S4). **c.** Spot5 (S5).

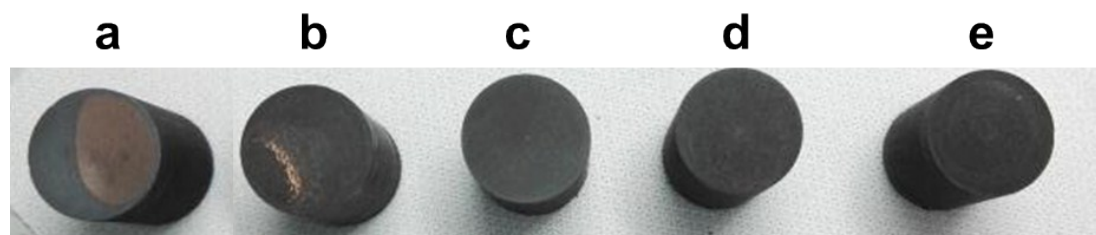

**Supplementary Figure S7.** Images of sintered  $\text{Cu}_2\text{S}-x\%\text{In}_2\text{S}_3$  (x=0, 1, 2, 5 and 10) columns by SPS. **a.**  $\text{Cu}_2\text{S}$ . **b.**  $\text{Cu}_2\text{S}-1\%\text{In}_2\text{S}_3$ . **c.**  $\text{Cu}_2\text{S}-2\%\text{In}_2\text{S}_3$ . **d.**  $\text{Cu}_2\text{S}-5\%\text{In}_2\text{S}_3$ . **e.**  $\text{Cu}_2\text{S}-10\%\text{In}_2\text{S}_3$ .
